# Supplementary material
Source: MDPI journal article supplement (https://www.mdpi.com/1999-4907/9/4/185)
Supplement: s1 [file s1]

# Investigating the Effect of a Mixed Mycorrhizal Inoculum on the Productivity of Biomass Plantation Willows Grown on Marginal Farm Land

Thomas Joseph Pray <sup>1</sup>, Werther Guidi Nissim <sup>2</sup>, Marc St-Arnaud <sup>1</sup> and Michel Labrecque <sup>1,\*</sup>

<sup>1</sup> Biodiversity Centre, Institut de recherche en biologie végétale, Université de Montréal and Jardin botanique de Montréal, Montréal, HIX 2B2, QC, Canada; tjpray@gmail.com (T.J.P.); marc.st-arnaud@umontreal.ca (M.S.-A.)

<sup>2</sup> Department of Agrifood Production and Environmental Science, University of Florence, 4,50121 Firenze, Italy; werther.guidinissim@unifi.it

\* Correspondence: michel.labrecque@umontreal.ca; Tel: +1-514-872-1862

## Supplementary Material

### 1. Additional height analyses

**Table S1.** 2010 Height ANOVA results (LOG transformed)

| Source                    | Nparm | DF | DFDen | F Ratio | Prob > F |
|---------------------------|-------|----|-------|---------|----------|
| field                     | 2     | 2  | 32    | 63.3900 | <.0001*  |
| inoculation               | 1     | 1  | 32    | 0.2956  | 0.5904   |
| field*inoculation         | 2     | 2  | 32    | 0.0614  | 0.9406   |
| species                   | 1     | 1  | 32    | 4.4930  | 0.0419*  |
| field*species             | 2     | 2  | 32    | 0.7960  | 0.4598   |
| inoculation*species       | 1     | 1  | 32    | 0.3374  | 0.5654   |
| field*inoculation*species | 2     | 2  | 32    | 0.8143  | 0.4519   |

All combinations of the block treatment, by itself and with the other treatment variables were part of the model, but block was treated differently since it was nested in the field variable and labeled as a random attribute. It therefore does not appear in this table. An asterisk (\*) next to the p-value denotes a 5% statistical significance.

**Table S2.** 2010 Height (cm) ANOVA predicted values and test results

|                             | Least Squares Mean | Standard Error | Test             |
|-----------------------------|--------------------|----------------|------------------|
| <b>Panel A: Field</b>       |                    |                | Tukey's test     |
| Dry                         | 102.18433          | 4.7197366      | B                |
| Rocky                       | 84.01693           | 4.7193538      | C                |
| Sandy                       | 161.26136          | 4.9292043      | A                |
| <b>Panel B: Inoculation</b> |                    |                | Student's T-test |
| Not inoculated              | 114.28638          | 3.8472487      | A                |
| Inoculated                  | 117.35537          | 3.8474574      | A                |
| <b>Panel C: Cultivar</b>    |                    |                | Student's T-test |
| SX64                        | 121.10819          | 3.3643152      | A                |
| SX61                        | 110.53356          | 3.3643152      | B                |

Different letters indicate better than 0.05 p-value difference between means. Data transformed for the analysis but not before generating this table, to allow comparison with other agricultural and forestry work.

**Table S3.** 2011 Height ANOVA results (LOG transformed)

| Source                   | Nparm | DF | DFDen | F Ratio | Prob > F |
|--------------------------|-------|----|-------|---------|----------|
| field                    | 2     | 2  | 33    | 44.0406 | <.0001*  |
| inoc                     | 1     | 1  | 33    | 0.7392  | 0.3961   |
| field*inoc               | 2     | 2  | 33    | 0.0904  | 0.9138   |
| fert                     | 1     | 1  | 33    | 40.6618 | <.0001*  |
| field*fert               | 2     | 2  | 33    | 0.9828  | 0.3849   |
| inoc*fert                | 1     | 1  | 33    | 0.0969  | 0.7575   |
| field*inoc*fert          | 2     | 2  | 33    | 0.3688  | 0.6944   |
| cultivar                 | 1     | 1  | 33    | 0.2922  | 0.5924   |
| field*cultivar           | 2     | 2  | 33    | 4.5066  | 0.0186*  |
| inoc*cultivar            | 1     | 1  | 33    | 0.2426  | 0.6256   |
| field*inoc*cultivar      | 2     | 2  | 33    | 0.5059  | 0.6076   |
| fert*cultivar            | 1     | 1  | 33    | 0.1325  | 0.7182   |
| field*fert*cultivar      | 2     | 2  | 33    | 1.1733  | 0.3219   |
| inoc*fert*cultivar       | 1     | 1  | 33    | 0.3443  | 0.5614   |
| field*inoc*fert*cultivar | 2     | 2  | 33    | 1.5840  | 0.2203   |

All combinations of the block treatment, by itself and with the other treatment variables were part of the model, but block was treated differently since it was nested in the field variable and labeled as a random attribute. It therefore does not appear in this table. An asterisk (\*) next to the p-value denotes a 5% statistical significance.

**Table S4.** 2011 Height (cm) ANOVA predicted values and test results

|                                         | Least Squares Mean | Standard Error | Test             |
|-----------------------------------------|--------------------|----------------|------------------|
| <b>Panel A: Inoculation<sup>1</sup></b> |                    |                | Student's T-test |
| Not inoculated                          | 255.52951          | 3.7838672      | A                |
| Inoculated                              | 258.10764          | 3.7838672      | A                |
| <b>Panel B: Nitrogen fertilization</b>  |                    |                | Student's T-test |
| Fertilized                              | 268.02257          | 3.7049795      | A                |
| Unfertilized                            | 245.61458          | 3.7049795      | B                |
| <b>Panel C: Field, by SX64</b>          |                    |                | Tukey's test     |
| Dry                                     | 252.03646          | 7.8390971      | B                |
| Rocky                                   | 230.96354          | 7.8390971      | B                |
| Sandy                                   | 290.61458          | 7.8390971      | A                |
| <b>Panel D: Field, by SX61</b>          |                    |                | Tukey's test     |
| Dry                                     | 241.98958          | 5.8055002      | B                |
| Rocky                                   | 217.35938          | 5.8055002      | C                |
| Sandy                                   | 307.94792          | 5.8055002      | A                |
| <b>Panel E: Cultivar, by Dry</b>        |                    |                | Student's T-test |
| SX64                                    | 252.03646          | 7.6478295      | A                |
| SX61                                    | 241.98958          | 7.6478295      | A                |
| <b>Panel F: Cultivar, by Rocky</b>      |                    |                | Student's T-test |
| SX64                                    | 230.96354          | 3.7392427      | A                |
| SX61                                    | 217.35938          | 3.7392427      | B                |
| <b>Panel G: Cultivar, by Sandy</b>      |                    |                | Student's T-test |

|      |           |           |   |
|------|-----------|-----------|---|
| SX64 | 290.61458 | 8.3822240 | B |
| SX61 | 307.94792 | 8.3822240 | A |

Different letters indicate better than 0.05 p-value difference between means. Data transformed for the analysis but not before generating this table, to allow comparison with other agricultural and forestry work.

**Table S5.** 2012 Height ANOVA results (LOG transformed)

| Source                   | Nparm | DF | DFDen | F Ratio | Prob > F |
|--------------------------|-------|----|-------|---------|----------|
| field                    | 2     | 2  | 29    | 69.0521 | <.0001*  |
| inoc                     | 1     | 1  | 29    | 0.0321  | 0.8590   |
| field*inoc               | 2     | 2  | 29    | 1.7677  | 0.1886   |
| fert                     | 1     | 1  | 29    | 34.4261 | <.0001*  |
| field*fert               | 2     | 2  | 29    | 0.3813  | 0.6863   |
| inoc*fert                | 1     | 1  | 29    | 1.7255  | 0.1993   |
| field*inoc*fert          | 2     | 2  | 29    | 0.5438  | 0.5863   |
| cultivar                 | 1     | 1  | 29    | 1.3861  | 0.2486   |
| field*cultivar           | 2     | 2  | 29    | 1.9688  | 0.1578   |
| inoc*cultivar            | 1     | 1  | 29    | 0.1091  | 0.7436   |
| field*inoc*cultivar      | 2     | 2  | 29    | 0.3310  | 0.7209   |
| fert*cultivar            | 1     | 1  | 29    | 3.9326  | 0.0569   |
| field*fert*cultivar      | 2     | 2  | 29    | 1.9303  | 0.1633   |
| inoc*fert*cultivar       | 1     | 1  | 29    | 0.6383  | 0.4308   |
| field*inoc*fert*cultivar | 2     | 2  | 29    | 1.2489  | 0.3018   |

All combinations of the block treatment, by itself and with the other treatment variables were part of the model, but block was treated differently since it was nested in the field variable and labeled as a random attribute. It therefore does not appear in this table. An asterisk (\*) next to the p-value denotes a 5% statistical significance.

**Table S6.** 2012 Height cm ANOVA predicted values and test results

|                                        | Least Squares Mean | Standard Error | Test             |
|----------------------------------------|--------------------|----------------|------------------|
| <b>Panel A: Field</b>                  |                    |                | Tukey's test     |
| Dry                                    | 355.32292          | 4.6853161      | A                |
| Rocky                                  | 287.23958          | 4.6853161      | A                |
| Sandy                                  | 358.76563          | 5.7383168      | A                |
| <b>Panel B: Inoculation</b>            |                    |                | Student's T-test |
| Not inoculated                         | 333.22917          | 4.5282070      | A                |
| Inoculated                             | 334.32292          | 4.5282070      | A                |
| <b>Panel C: Nitrogen fertilization</b> |                    |                | Student's T-test |
| Fertilized                             | 268.02257          | 3.7049795      | A                |
| Unfertilized                           | 245.61458          | 3.7049795      | B                |
| <b>Panel D: Cultivar</b>               |                    |                | Student's T-test |
| SX64                                   | 330.07639          | 4.2739418      | A                |
| SX61                                   | 337.47569          | 4.2739418      | A                |

Different letters indicate better than 0.05 p-value difference between means. Data transformed for the analysis but not before generating this table, to allow comparison with other agricultural and forestry work.

### 3. Additional mass analyses

**Table S7.** 2011 Oven dry tons /ha ANOVA results (LOG transformed)

| Source                   | Nparm | DF | DFDen | F Ratio | Prob > F |
|--------------------------|-------|----|-------|---------|----------|
| field                    | 2     | 2  | 33    | 18.6140 | <.0001*  |
| inoc                     | 1     | 1  | 33    | 0.9277  | 0.3425   |
| field*inoc               | 2     | 2  | 33    | 0.0934  | 0.9110   |
| fert                     | 1     | 1  | 33    | 58.7500 | <.0001*  |
| field*fert               | 2     | 2  | 33    | 4.3614  | 0.0208*  |
| inoc*fert                | 1     | 1  | 33    | 0.0399  | 0.8429   |
| field*inoc*fert          | 2     | 2  | 33    | 0.2666  | 0.7676   |
| cultivar                 | 1     | 1  | 33    | 1.8588  | 0.1820   |
| field*cultivar           | 2     | 2  | 33    | 0.5180  | 0.6005   |
| inoc*cultivar            | 1     | 1  | 33    | 1.9361  | 0.1734   |
| field*inoc*cultivar      | 2     | 2  | 33    | 0.2127  | 0.8095   |
| fert*cultivar            | 1     | 1  | 33    | 1.0404  | 0.3153   |
| field*fert*cultivar      | 2     | 2  | 33    | 0.2383  | 0.7893   |
| inoc*fert*cultivar       | 1     | 1  | 33    | 3.8483  | 0.0582   |
| field*inoc*fert*cultivar | 2     | 2  | 33    | 0.5025  | 0.6096   |

All combinations of the block treatment, by itself and with the other treatment variables were part of the model, but block was treated differently since it was nested in the field variable and labeled as a random attribute. It therefore does not appear in this table. An asterisk (\*) next to the p-value denotes a 5% statistical significance.

**Table S8.** 2011 Oven dry tons /ha ANOVA predicted values and test results

|                                                  | Least Squares Mean | Standard Error | Test             |
|--------------------------------------------------|--------------------|----------------|------------------|
| <b>Panel A: Inoculation</b>                      |                    |                | Student's T-test |
| Not inoculated                                   | 3.2559861          | 0.18766585     | A                |
| Inoculated                                       | 3.3419896          | 0.18759477     | A                |
| <b>Panel B: Cultivar</b>                         |                    |                | Student's T-test |
| SX64                                             | 3.3655104          | 0.19033297     | A                |
| SX61                                             | 3.2324653          | 0.19026289     | A                |
| <b>Panel C: Field, by fertilized</b>             |                    |                | Tukey's test     |
| Dry                                              | 2.9263348          | 0.34074839     | B                |
| Rocky                                            | 2.8243854          | 0.34030058     | B                |
| Sandy                                            | 5.7627500          | 0.34030058     | A                |
| <b>Panel D: Field, by unfertilized</b>           |                    |                | Tukey's test     |
| Dry                                              | 2.5881667          | 0.25714174     | B                |
| Rocky                                            | 1.8655000          | 0.25714174     | B                |
| Sandy                                            | 3.8195625          | 0.25714174     | A                |
| <b>Panel E: Nitrogen fertilization, by Dry</b>   |                    |                | Student's T-test |
| Fertilized                                       | 2.9287531          | 0.27895837     | A                |
| Unfertilized                                     | 2.5881667          | 0.27869378     | A                |
| <b>Panel F: Nitrogen fertilization, by Rocky</b> |                    |                | Student's T-test |
| Fertilized                                       | 2.8243854          | 0.17892886     | A                |
| Unfertilized                                     | 1.8655000          | 0.17892886     | B                |
| <b>Panel G: Nitrogen fertilization, by Sandy</b> |                    |                | Student's T-test |

|              |           |            |   |
|--------------|-----------|------------|---|
| Fertilized   | 5.7627500 | 0.40362255 | A |
| Unfertilized | 3.8195625 | 0.40362255 | B |

Different letters indicate better than 0.05 p-value difference between means. Data transformed for the analysis but not before generating this table, to allow comparison with other agricultural and forestry work.

**Table S9.** 2012 Oven dry tons /ha ANOVA results (LOG transformed)

| Source                   | Nparm | DF | DFDen | F Ratio | Prob > F |
|--------------------------|-------|----|-------|---------|----------|
| field                    | 2     | 2  | 29    | 18.7248 | <.0001*  |
| cultivar                 | 1     | 1  | 29    | 4.5113  | 0.0423*  |
| field*cultivar           | 2     | 2  | 29    | 3.1593  | 0.0574   |
| fert                     | 1     | 1  | 29    | 24.2716 | <.0001*  |
| field*fert               | 2     | 2  | 29    | 0.3974  | 0.6757   |
| cultivar*fert            | 1     | 1  | 29    | 0.0001  | 0.9921   |
| field*cultivar*fert      | 2     | 2  | 29    | 1.1389  | 0.3341   |
| inoc                     | 1     | 1  | 29    | 0.1710  | 0.6823   |
| field*inoc               | 2     | 2  | 29    | 0.9470  | 0.3996   |
| cultivar*inoc            | 1     | 1  | 29    | 0.0881  | 0.7688   |
| field*cultivar*inoc      | 2     | 2  | 29    | 0.1770  | 0.8387   |
| fert*inoc                | 1     | 1  | 29    | 0.0401  | 0.8426   |
| field*fert*inoc          | 2     | 2  | 29    | 0.7959  | 0.4608   |
| cultivar*fert*inoc       | 1     | 1  | 29    | 0.2776  | 0.6023   |
| field*cultivar*fert*inoc | 2     | 2  | 29    | 0.0050  | 0.9950   |

All combinations of the block treatment, by itself and with the other treatment variables were part of the model, but block was treated differently since it was nested in the field variable and labeled as a random attribute. It therefore does not appear in this table. An asterisk (\*) next to the p-value denotes a 5% statistical significance.

**Table S10.** 2012 Oven dry tons /ha ANOVA predicted values and test results

|                                        | Least Squares Mean | Standard Error | Test             |
|----------------------------------------|--------------------|----------------|------------------|
| <b>Panel A: Field</b>                  |                    |                | Tukey's test     |
| Dry                                    | 9.146802           | 0.42706946     | A                |
| Rocky                                  | 6.755115           | 0.42706946     | B                |
| Sandy                                  | 10.650906          | 0.52305114     | A                |
| <b>Panel B: Inoculation</b>            |                    |                | Student's T-test |
| Not inoculated                         | 9.1420208          | 0.43277771     | A                |
| Inoculated                             | 8.5598611          | 0.43277771     | A                |
| <b>Panel C: Nitrogen fertilization</b> |                    |                | Student's T-test |
| Fertilized                             | 9.8563368          | 0.34441827     | A                |
| Unfertilized                           | 7.8455451          | 0.34441827     | B                |
| <b>Panel D: Cultivar</b>               |                    |                | Student's T-test |
| SX64                                   | 9.3320451          | 0.37632919     | A                |
| SX61                                   | 8.3698368          | 0.37632919     | A                |

Different letters indicate better than 0.05 p-value difference between means. These values represent two seasons of growth. Data transformed for the analysis but not before generating this table, to allow comparison with other agricultural and forestry work.

## 2. Additional diameter analyses

**Table S11.** 2010 Stem basal area ANOVA results (LOG transformed)

| Source         | Nparm | DF | DFDen | F Ratio | Prob > F |
|----------------|-------|----|-------|---------|----------|
| field          | 2     | 2  | 32    | 71.3478 | <.0001*  |
| inoc           | 1     | 1  | 32    | 0.2942  | 0.5913   |
| field*inoc     | 2     | 2  | 32    | 0.2974  | 0.7448   |
| cultivar       | 1     | 1  | 32    | 6.8584  | 0.0134*  |
| field*cultivar | 2     | 2  | 32    | 1.5426  | 0.2293   |
| inoc*cultivar  | 1     | 1  | 32    | 0.2683  | 0.6080   |

All combinations of the block treatment, by itself and with the other treatment variables were part of the model, but block was treated differently since it was nested in the field variable and labeled as a random attribute. It therefore does not appear in this table. An asterisk (\*) next to the p-value denotes a 5% statistical significance.

**Table S12.** 2010 Stem basal area per hectare (m<sup>2</sup>/ha) ANOVA predicted values and test results

|                                         | Least Squares Mean | Standard Error | Test             |
|-----------------------------------------|--------------------|----------------|------------------|
| <b>Panel A: Field</b>                   |                    |                | Tukey's test     |
| Dry                                     | 2.6053323          | 0.38832364     | B                |
| Rocky                                   | 2.1631002          | 0.38830761     | B                |
| Sandy                                   | 7.5695565          | 0.40557407     | A                |
| <b>Panel B: Inoculation<sup>1</sup></b> |                    |                | Student's T-test |
| Not inoculated                          | 4.0063284          | 0.28720369     | A                |
| Inoculated                              | 4.2189976          | 0.28721333     | A                |
| <b>Panel C: Cultivar</b>                |                    |                | Student's T-test |
| SX64                                    | 4.5770967          | 0.25273457     | A                |
| SX61                                    | 3.6482293          | 0.25273457     | B                |

<sup>1</sup> These least squares mean values were used to generate the 2010 bars for Figure 1.

Different letters indicate better than 0.05 p-value difference between means. Data transformed for the analysis but not before generating this table, to allow comparison with other agricultural and forestry work.

**Table S13.** 2012 Stem basal area ANOVA results (LOG transformed)

| Source              | Nparm | DF | DFDen | F Ratio | Prob > F |
|---------------------|-------|----|-------|---------|----------|
| field               | 2     | 2  | 29    | 11.4172 | 0.0002*  |
| cultivar            | 1     | 1  | 29    | 0.1088  | 0.7439   |
| field*cultivar      | 2     | 2  | 29    | 3.9184  | 0.0312*  |
| fert                | 1     | 1  | 29    | 10.1083 | 0.0035*  |
| field*fert          | 2     | 2  | 29    | 0.2931  | 0.7481   |
| cultivar*fert       | 1     | 1  | 29    | 0.2028  | 0.6558   |
| field*cultivar*fert | 2     | 2  | 29    | 1.7832  | 0.1860   |
| inoc                | 1     | 1  | 29    | 0.6511  | 0.4263   |
| field*inoc          | 2     | 2  | 29    | 1.2736  | 0.2950   |
| cultivar*inoc       | 1     | 1  | 29    | 0.2813  | 0.5999   |
| field*cultivar*inoc | 2     | 2  | 29    | 0.2105  | 0.8114   |
| fert*inoc           | 1     | 1  | 29    | 1.6048  | 0.2153   |

|                          |   |   |    |        |        |
|--------------------------|---|---|----|--------|--------|
| field*fert*inoc          | 2 | 2 | 29 | 0.5363 | 0.5906 |
| cultivar*fert*inoc       | 1 | 1 | 29 | 0.3318 | 0.5690 |
| field*cultivar*fert*inoc | 2 | 2 | 29 | 0.0610 | 0.9409 |

All combinations of the block treatment, by itself and with the other treatment variables were part of the model, but block was treated differently since it was nested in the field variable and labeled as a random attribute. It therefore does not appear in this table. An asterisk (\*) next to the p-value denotes a 5% statistical significance.

**Table S14.** 2012 Stem basal area per hectare (m<sup>2</sup>/ha) ANOVA predicted values and test results

|                                         | Least Squares Mean | Standard Error | Test             |
|-----------------------------------------|--------------------|----------------|------------------|
| <b>Panel A: Inoculation<sup>1</sup></b> |                    |                | Student's T-test |
| Not inoculated                          | 28.559201          | 1.0040098      | A                |
| Inoculated                              | 27.488155          | 1.0040098      | A                |
| <b>Panel B: Nitrogen fertilization</b>  |                    |                | Student's T-test |
| Fertilized                              | 30.177806          | 0.97665161     | A                |
| Unfertilized                            | 25.869550          | 0.97665161     | B                |
| <b>Panel C: Field, by SX64</b>          |                    |                | Tukey's test     |
| Dry                                     | 34.709104          | 1.8646605      | A                |
| Rocky                                   | 26.283434          | 1.8646605      | B                |
| Sandy                                   | 24.899135          | 2.2837334      | B                |
| <b>Panel D: Field, by SX641</b>         |                    |                | Tukey's test     |
| Dry                                     | 29.489316          | 1.3162810      | A                |
| Rocky                                   | 23.258381          | 1.3162810      | B                |
| Sandy                                   | 29.502699          | 1.6121084      | A                |
| <b>Panel E: Cultivar, by Dry</b>        |                    |                | Student's T-test |
| SX64                                    | 34.709104          | 2.1116928      | A                |
| SX61                                    | 29.489316          | 2.1116928      | A                |
| <b>Panel F: Cultivar, by Rocky</b>      |                    |                | Student's T-test |
| SX64                                    | 12.486569          | 0.44855227     | A                |
| SX61                                    | 12.381127          | 0.44855227     | A                |
| <b>Panel G: Cultivar, by Sandy</b>      |                    |                | Student's T-test |
| SX64                                    | 24.899135          | 1.4917259      | B                |
| SX61                                    | 29.502699          | 1.4917259      | A                |

<sup>1</sup> These least squares mean values were used to generate the 2012 bars for Figure 1.

Different letters indicate better than 0.05 p-value difference between means. Data transformed for the analysis but not before generating this table, to allow comparison with other agricultural and forestry work.

|      | B1 |    | B2 |    | B3 |    | B4 |    | B5 |    | B6 |    |             |
|------|----|----|----|----|----|----|----|----|----|----|----|----|-------------|
| 0.9m | 9m |             |
|      |    |    |    |    |    |    |    |    |    |    |    |    |             |
|      | F- | F+ | F- | F+ | F+ | F- | F- | F+ | F- | F+ | F+ | F- | SM (3 rows) |
| 9m   |    |    |    |    |    |    |    |    |    |    |    |    |             |
|      | M+ | M+ | M- | M- | M+ | M+ | M+ | M+ | M- | M- | M- | M- | SS (3 rows) |
|      |    |    |    |    |    |    |    |    |    |    |    |    |             |
| 1.8m |    |    |    |    |    |    |    |    |    |    |    |    |             |
|      | F- | F+ | F+ | F- | F- | F+ | F+ | F- | F+ | F- | F- | F+ | SS (3 rows) |

|      |    |    |    |    |    |    |     |    |     |    |     |    |             |  |
|------|----|----|----|----|----|----|-----|----|-----|----|-----|----|-------------|--|
| 9m   |    |    |    |    |    |    |     |    |     |    |     |    |             |  |
|      | M- | M- | M+ | M+ | M- | M- | M-  | M- | M+  | M+ | M+  | M+ | SM (3 rows) |  |
|      |    |    |    |    |    |    |     |    |     |    |     |    |             |  |
| 1.8m |    |    |    |    |    |    |     |    |     |    |     |    |             |  |
|      |    |    |    |    |    |    |     |    |     |    |     |    |             |  |
|      | F+ | F- | F+ | F- | F- | F+ | F+  | F- | F-  | F+ | F-  | F+ | SM (3 rows) |  |
| 9m   |    |    |    |    |    |    |     |    |     |    |     |    |             |  |
|      | M- | M- | M- | M- | M+ | M+ | M-  | M- | M+  | M+ | M+  | M+ | SS (3 rows) |  |
|      |    |    |    |    |    |    |     |    |     |    |     |    |             |  |
| 1.8m |    |    |    |    |    |    |     |    |     |    |     |    |             |  |
|      |    |    |    |    |    |    |     |    |     |    |     |    |             |  |
|      | F+ | F- | F- | F+ | F+ | F- | F-  | F+ | F+  | F- | F+  | F- | SS (3 rows) |  |
| 9m   |    |    |    |    |    |    |     |    |     |    |     |    |             |  |
|      | M+ | M+ | M+ | M+ | M- | M- | M+  | M+ | M-  | M- | M-  | M- | SM (3 rows) |  |
|      |    |    |    |    |    |    |     |    |     |    |     |    |             |  |
| 0.9m | B7 |    | B8 |    | B9 |    | B10 |    | B11 |    | B12 |    |             |  |

**Figure S1.** Experimental design (each field randomized according to the schema, rocky field shown as an example). Widths compressed substantially compared to heights to fit on page; actual measurements given on side and top of plan. B refers to block; F to fertilization; M to inoculation. + sign means the subplot was fertilized or inoculated; – sign that it was not. SM stands for cultivar *Salix miyabeana* ‘SX61’, SS for cultivar ‘SX64’.
